# Supplementary material
Source: ML conference proceedings conference paper supplement (https://openaccess.thecvf.com/content/CVPR2026/html/Zhao_Spherical_Leech_Quantization_CVPR_2026_paper.html)
Supplement: Supplementary file 1 [file Zhao_Spherical_Leech_Quantization_CVPR_2026_supplemental.pdf]

## A. Constructing Fibonacci Lattices

**Fibonacci lattice** constructs points that “are evenly distributed with each of them representing almost the same area” [30] in a unit square  $[0, 1]^2$  using the formula:

$$(x_i, y_i) = \left(i - \lfloor \frac{i}{\psi} \rfloor, \frac{i}{n}\right) \text{ for } 0 \leq i < n, \quad (12)$$

where  $\psi = \lim_{n \rightarrow \infty} \left(\frac{F_{n+1}}{F_n}\right) = \frac{1+\sqrt{5}}{2}$ . We can map this point distribution to a unit-length sphere  $\mathbb{S}^2$  using cylindrical equal-area projection.

$$\begin{pmatrix} x_i \\ y_i \end{pmatrix} \rightarrow \begin{pmatrix} \theta_i = 2\pi x_i \\ \phi_i = \arccos(1 - 2y_i) \end{pmatrix} \rightarrow \begin{pmatrix} x'_i = \cos \theta_i \sin \phi_i \\ y'_i = \sin \theta_i \sin \phi_i \\ z'_i = \cos \phi_i \end{pmatrix}. \quad (13)$$

### A.1. Generalizing the Spherical Fibonacci Lattice to higher dimensions

We provide the details to generalize the 3D spherical Fibonacci lattice [30] to higher dimensions [67].

Given a  $d$ -dimensional vector  $\mathbf{u} = (u_1, u_2, \dots, u_{d+1}) \in \mathbb{S}^d \subset \mathbb{R}^{d+1}$ , we can also represent it in the hyperspherical coordinate system  $(r, \varphi_1, \varphi_2, \dots, \varphi_d)$ , where  $\varphi_1 \in [0, 2\pi]$ ,  $\varphi_2, \dots, \varphi_d \in [0, \pi]$ , and specifically,  $r = 1$  for  $|\mathbf{u}| = 1$ . The conversion to Cartesian coordinates is given as follows:

$$\begin{aligned} u_{d+1} &= \cos(\varphi_d) \\ u_d &= \sin(\varphi_d) \cos(\varphi_{d-1}) \\ &\vdots \\ u_2 &= \sin(\varphi_d) \sin(\varphi_{d-1}) \cdots \sin(\varphi_2) \cos(\varphi_1) \\ u_1 &= \sin(\varphi_d) \sin(\varphi_{d-1}) \cdots \sin(\varphi_2) \sin(\varphi_1). \end{aligned}$$

We examine the distribution over the angular coordinates  $\Phi_{1, \dots, d-1, d} \in [0, 2\pi] \times [0, \pi]^{d-1}$ .

$$\begin{aligned} p(\Phi_{1:d}) &= p(\Phi_1, \Phi_2, \dots, \Phi_d) \\ &= \rho(\Phi_1) \rho(\Phi_2 | \Phi_1) \cdots \rho(\Phi_d | \Phi_1, \dots, \Phi_{1:d-1}). \end{aligned} \quad (14)$$

The key observation is that the angles are independently distributed. To see this, if we fix  $(\varphi_1, \dots, \varphi_k)$ , then  $(\varphi_{k+1}, \dots, \varphi_d)$  parameterizes a “subsphere” isomorphic to  $\mathbb{S}^{d-k}$  with a rescaled radius  $r' = \sin(\varphi_1) \cdots \sin(\varphi_k)$ . In other words,  $p(\Phi_{k+1:d} | \Phi_{1:k}) = p(\Phi_{k+1:d})$  for any  $k \in [d]$ . As such, Equation 15 can be simplified to:

$$p(\Phi_{1:d}) = \prod_{\alpha=1}^d p_\alpha(\Phi_\alpha). \quad (16)$$

The absolute value of the Jacobian determinant for the change of variables  $(u_1, \dots, u_{d+1}) \mapsto (r, \varphi_1, \dots, \varphi_d)$  is

$$\left| \frac{\partial(u_1, \dots, u_{d+1})}{\partial(r, \varphi_1, \dots, \varphi_d)} \right| = r^d \prod_{k=2}^d \sin^{k-1} \varphi_k. \quad (17)$$

Therefore, Equation 15 reduces to

$$p(\Phi_{1:d}) \propto \prod_{k=2}^d \sin^{k-1} \varphi_k. \quad (18)$$

With Equation 16, we have  $p(\Phi_k) \propto \sin^{k-1} \varphi_k$ . Then we get the normalization constants  $Z_k = \int_0^\pi \sin^{k-1} \varphi d\varphi = \frac{\sqrt{\pi} \Gamma(k/2)}{\Gamma((k+1)/2)}$  for  $k = 2, \dots, d$  and  $Z_1 = \int_0^{2\pi} d\varphi_1 = 2\pi$ . Finally, we arrive at

$$P(\Phi_k = \varphi_k) = \begin{cases} \frac{1}{2\pi}, & k = 1 \\ \frac{1}{\sqrt{\pi}} \frac{\Gamma(\frac{k+1}{2})}{\Gamma(\frac{k}{2})} \sin^{k-1} \varphi_k, & k = 2, \dots, d \end{cases} \quad (19)$$

Denote the cumulative distribution function with another variable  $Y$

$$\begin{aligned} P(Y = y) &= F_\Phi(\varphi) = \int_0^{\varphi_k} p(\Phi = u) du \\ &= \begin{cases} \frac{1}{2\pi} y, & k = 1 \\ \dots \end{cases} \end{aligned} \quad (20)$$

The Fibonacci-like spiral  $\mathbf{Y}^{(n)} = (\mathbf{Y}_1^{(n)}, \dots, \mathbf{Y}_d^{(n)})$  is generated by the following formula:

$$\mathbf{Y}_d^{(n)} = \frac{n}{N+1}, \quad (22)$$

$$\mathbf{Y}_{d-1}^{(n)} = \{na_1\}, \quad (23)$$

$$\vdots \quad (24)$$

$$\mathbf{Y}_1^{(n)} = \{na_{d-1}\}, \quad (25)$$

$$\vdots \quad (26)$$

where  $\{x\}$  refers to  $x$ 's decimal part, i.e.  $\{x\} = x - \lfloor x \rfloor$ .  $a_{1:d}$  satisfies  $\frac{a_i}{a_j} \notin \mathbb{Q}, \forall i \neq j$ .

The angles are given by taking the inverse:

$$\varphi_d^{(n)} = F^{-1}(Y_d^{(n)}) \quad (27)$$

$$\varphi[t+1] = \varphi[t] - \frac{F(\varphi[t]) - Y}{F'(\varphi[t])} \quad (28)$$



Table 11. **Model configurations for Infinity-CC.**

| layer | embed dim | # heads | # params (head) | # epochs |
|-------|-----------|---------|-----------------|----------|
| 12    | 768       | 8       | 242M (151M)     | 50       |
| 16    | 1152      | 12      | 394M (226M)     | 200      |
| 24    | 1536      | 16      | 1B (300M)       | 350      |
| 32    | 2048      | 16      | 2.8B (402M)     | 400      |

Table 12. **VAR Tokenizer.**

|                                | $ C $   | rFID $_{\downarrow}$ | LPIPS $_{\downarrow}$ | SSIM $_{\uparrow}$ | PSNR $_{\uparrow}$ |
|--------------------------------|---------|----------------------|-----------------------|--------------------|--------------------|
| <i>(fast schedule)</i>         |         |                      |                       |                    |                    |
| BSQ                            | 16,384  | 1.82                 | 0.1268                | 0.5626             | 19.989             |
| $\wedge_{24}$ -SQ $^{\dagger}$ | 16,384  | 1.36                 | 0.1170                | 0.5957             | 20.639             |
| BSQ                            | 262,144 | 1.29                 | 0.1106                | 0.6006             | 20.683             |
| $\wedge_{24}$ -SQ              | 196,560 | 1.08                 | 0.1005                | 0.6280             | 21.315             |
| $\wedge_{24}$ -SQ (vf)         | 196,560 | 1.18                 | 0.1088                | 0.6006             | 20.734             |
| <i>(standard schedule)</i>     |         |                      |                       |                    |                    |
| BSQ                            | 262,144 | 1.07                 | 0.1064                | 0.6035             | 20.430             |
| $\wedge_{24}$ -SQ              | 196,560 | <b>0.84</b>          | <b>0.0954</b>         | <b>0.6333</b>      | <b>21.535</b>      |
| $\wedge_{24}$ -SQ (vf)         | 196,560 | <u>0.92</u>          | <u>0.1041</u>         | <u>0.6118</u>      | <u>21.188</u>      |

the standard schedule trains the model for 500k iterations with 32 GPUs, which is approximately 100 epochs.

## D. More Results

### D.1. VAR tokenization

First, we retrain a VAR tokenizer with a fast schedule (25 epochs). We use  $\wedge_{24}$ -SQ as the bottleneck with two codebook sizes: (1) the full codebook, whose bitrate is similar to BSQ ( $d = 18$ ), and (2) a subset of 16,384 codes, whose bitrate is equivalent to BSQ ( $d = 14$ ). From the upper half of Table 12,  $\wedge_{24}$ -SQ outperforms BSQ in all metrics in both cases. Next, we train a VAR tokenizer with the standard schedule (100 epochs) suggested in Infinity [36]. The full numbers are reported in the bottom half of Table 12, supplementing Figure 5.

### D.2. VAR generation

**Grid search of sampling parameters.** We run a small-scale grid search of sampling hyperparameters for Infinity-CC with different prediction heads. We compare the gFID score on IN-1k by generating 10 samples per class (10k generated samples in total). From Figure 8, we conclude that the optimal top  $k$  varies significantly across different prediction head settings.

**Advanced sampling techniques.** In Section 4.3, we introduced advanced sampling techniques, including layerwise linearly scaling CFG and linearly scaling top- $k$ . We show related ablation studies in Table 13. We use  $\text{lin}(x_0, s)$  to denote the linear scaling strategy, which starts from  $x_0$  and

Table 13. **Advanced sampling techniques.**  $\text{lin}(x_0, \pm s)$  denotes the linear scaling strategy which starts from  $x_0$  and increment/decrements by  $s$  per scale.

| Tokenizer                  | rFID | CFG                   | top $k$                   | gFID |
|----------------------------|------|-----------------------|---------------------------|------|
| $\wedge_{24}$ -SQ (25 ep)  | 1.08 | 2                     | $5 \times 10^3$           | 8.78 |
| $\wedge_{24}$ -SQ (100 ep) | 0.84 | 2                     | $5 \times 10^3$           | 7.46 |
| $\wedge_{24}$ -SQ (100 ep) | 0.84 | $\text{lin}(1, 0.33)$ | $5 \times 10^3$           | 6.81 |
| $\wedge_{24}$ -SQ (100 ep) | 0.84 | $\text{lin}(1, 0.25)$ | $5 \times 10^3$           | 7.33 |
| $\wedge_{24}$ -SQ (100 ep) | 0.84 | $\text{lin}(1, 0.33)$ | $\text{lin}(10^4, -10^3)$ | 6.68 |
| $\wedge_{24}$ -SQ (vf)     | 1.18 | $\text{lin}(1, 0.33)$ | $5 \times 10^3$           | 5.79 |
| $\wedge_{24}$ -SQ (vf)     | 1.18 | $\text{lin}(1, 0.33)$ | 2,500                     | 5.41 |
| $\wedge_{24}$ -SQ (vf)     | 1.18 | $\text{lin}(1, 0.33)$ | $\text{lin}(2000, -100)$  | 5.30 |

changes by  $s$  per scale. We can see that both layerwise linear scaling CFG and top- $k$  bring a noticeable improvement.

It is also worth noting that, according to the bottom half of Table 13, the optimal  $k$  decreases when the tokenizer is trained with the VF loss. This is most likely because the probability density is more skewed, as is illustrated in Figure 4.

**Qualitative Results.** Figure 9 shows more generation results sampled by Infinity-CC +  $\wedge_{24}$ -SQ (2B). We cherry-pick the images and emphasize the quality *and* diversity.

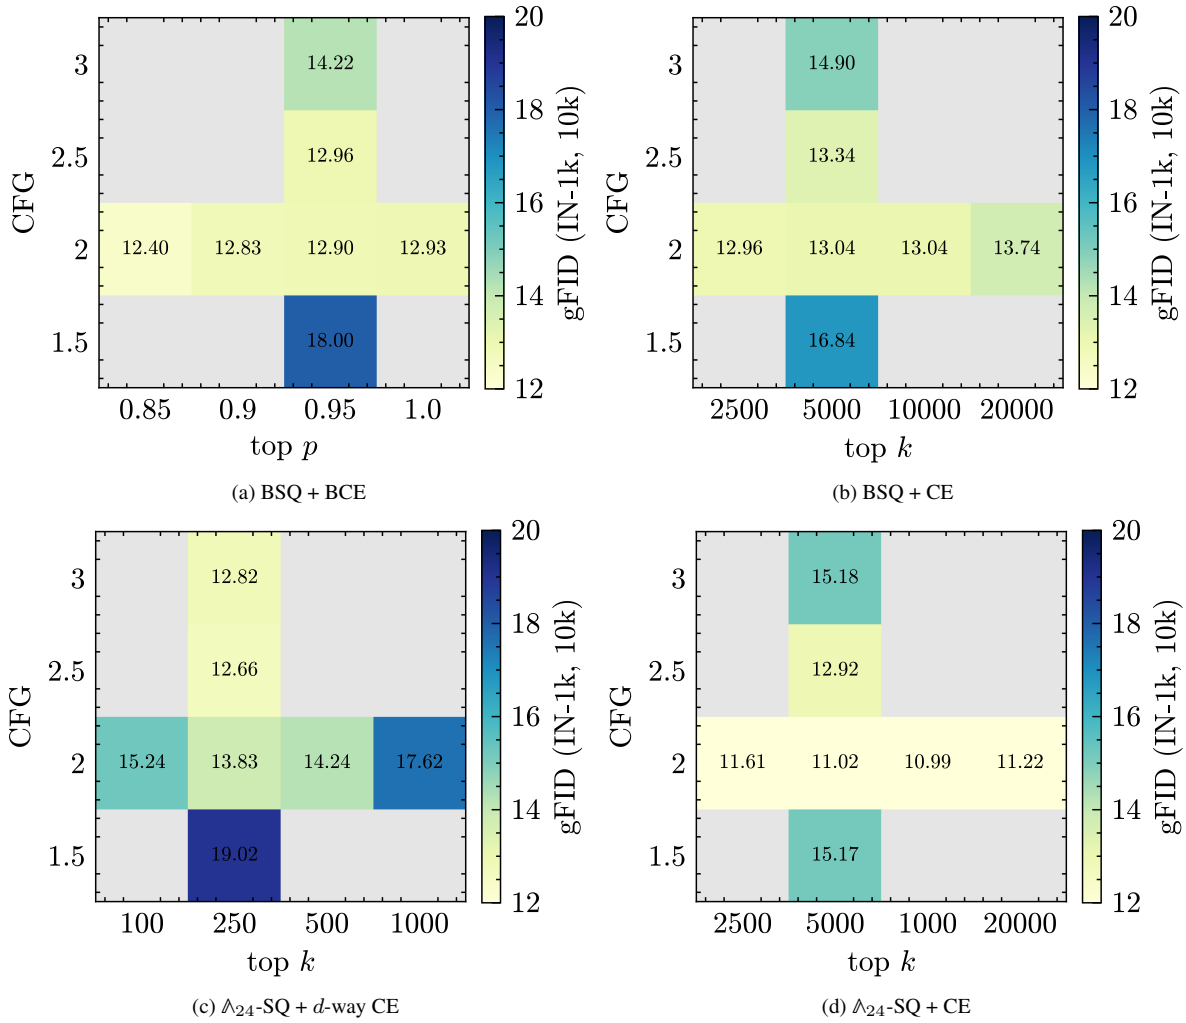

Figure 8. **Hyperparameter grid search supplementing Table 9.** We use a fixed temperature  $\tau = 1$  in (a-d) and top  $p = 0.95$  in (b-d).

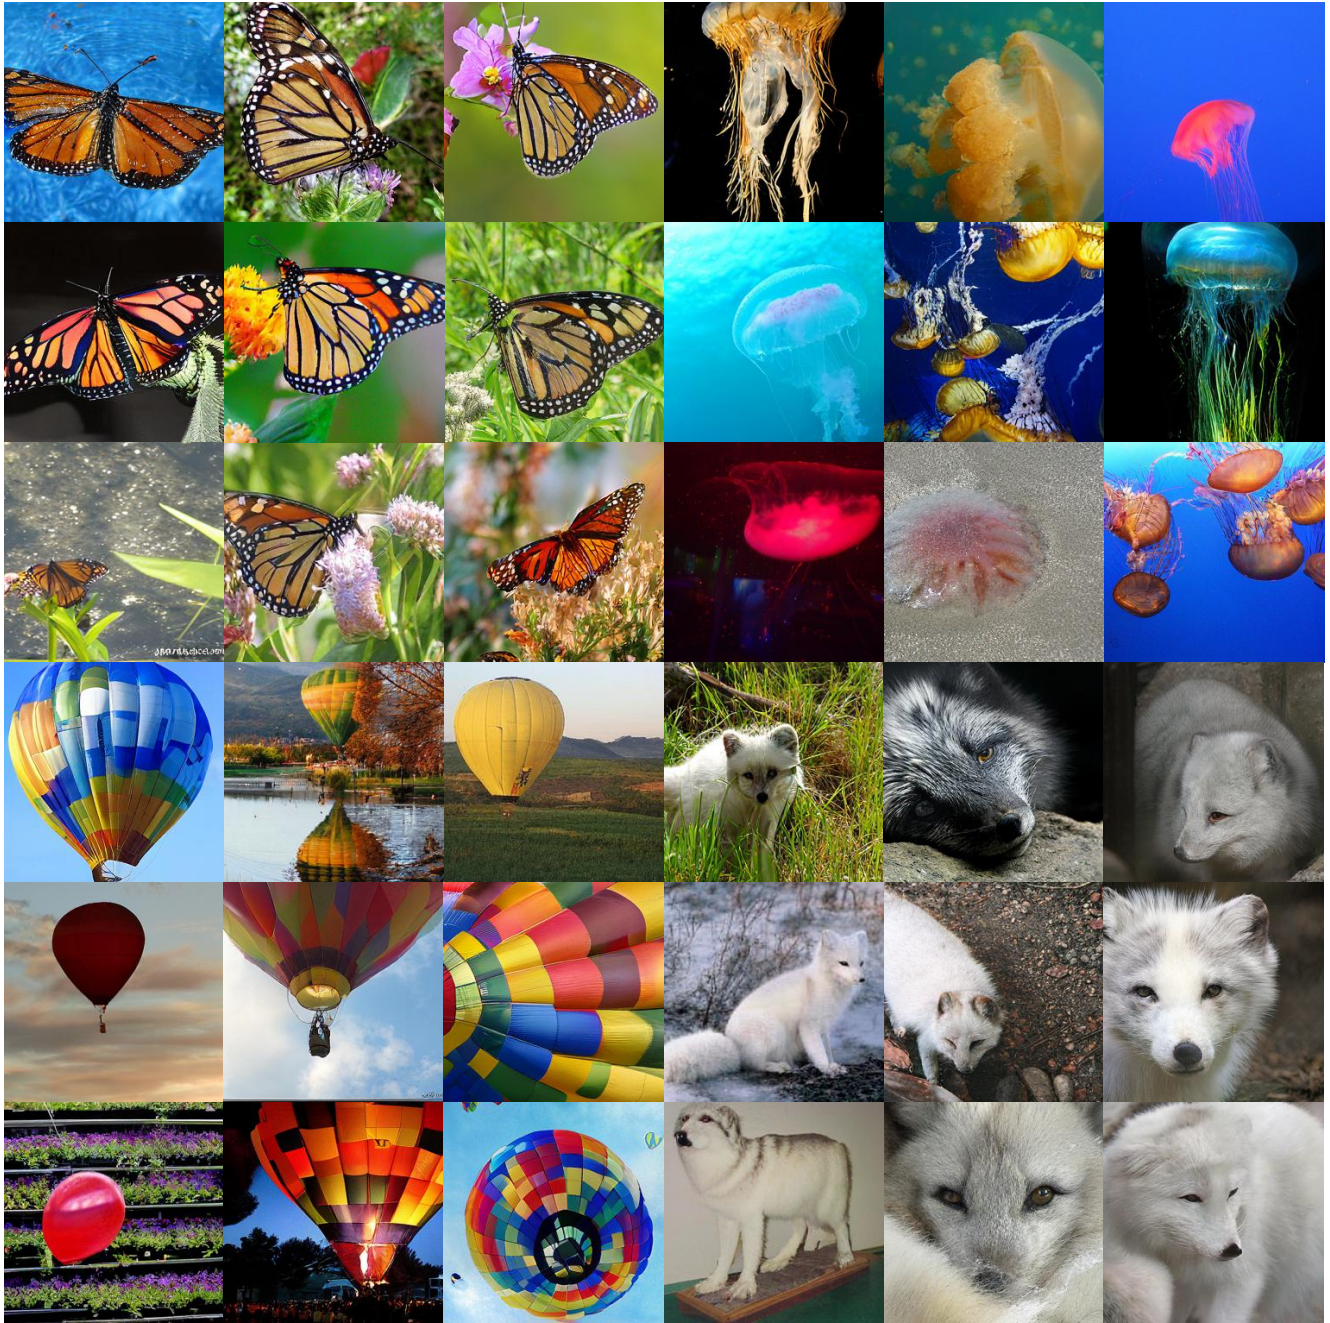

Figure 9. More sampled generation results of Infinity-CC +  $\mathbb{A}_{24}$ -SQ (2B). Classes are 323: monarch butterfly; 107: jellyfish; 417: balloon; 279: arctic fox.
